# Supplementary material for: Evaluating the effects of IADHFL on inhibiting DPP-IV activity and expression in Caco-2 cells and contributing to the amount of insulin released from INS-1 cells in vitro
Source: Royal Society of Chemistry journal article supplement (doi:10.1039/c7fo01950e), 2018-01-01
Supplement: c7fo01950e1.pdf [file c7fo01950e1.pdf]

|           |                                  |
|-----------|----------------------------------|
| GAPDH-F   | 5' -gCACCgTCAAggCTgAgAAC-3'      |
| GAPDH-R   | 5' -TggTgAAgACgCCAgTggA-3'       |
| DPP-IV-3F | 5' -ggCACCTgggAAgTCATCgggA-3'    |
| DPP-IV-3R | 5' -AgAggggCAgACCAggACCg-3'      |
| Ins1F     | 5' -AgCAAgCaggTCATTgTTCC-3'      |
| Ins1R     | 5' -TgCCAaggTCTgAAgATCCC-3'      |
| Ptpn1F    | 5' -gACTCgTCAgTgCAggATCA-3'      |
| Ptpn1R    | 5' -ggACAgATgCCTgAgCACTT-3'      |
| GLP-1RF   | 5' -gggTCTCTggCTACATAAggACAAC-3' |
| GLP-1RR   | 5' -AAggATggCTgAAgCgATgAC-3'     |
| GIPRF     | 5' -TgTgCCAgggTggTgACTTTAC-3'    |
| GIPRR     | 5' -TgggAACCGTTTgTgTTTgg-3'      |
| Ins13F    | 5' -TACTgCTgCTCCTggCTCTA-3'      |
| Ins13R    | 5' -gCAgCAgCTCCCggTC-3'          |
| Slc2a1F   | 5' -CgggCATCAATgCTgTgTTC-3'      |
| Slc2a1R   | 5' -gATAggACATCCAgggCAgC-3'      |
| Abcc8F    | 5' -TTCTTCTTATgCCCAAACC-3'       |
| Abcc8R    | 5' -gACAgCCgCTCCAATCAA-3'        |
| Shc1F     | 5' -ATAgCCCgACTACCCTgTgT-3'      |
| Shc1R     | 5' -gCAACCCATgTACCgAACCA-3'      |
| Irs2F     | 5' -gCCACCgTggTgAAAgAgTA-3'      |
| Irs2R     | 5' -AgCgTTggTTggAAACATgC-3'      |
| Igfbp1F   | 5' -CACAgCAAACAgTgCgAgAC-3'      |
| Igfbp1R   | 5' -TggTCTCCAgAgATCCAggg-3'      |
| Creb1-F   | 5' -CTgAggAgCTTgTACCACCg-3'      |
| Creb1-R   | 5' -ATggATACCTgggCTAATgTgg-3'    |
| Rapgef4-F | 5' -gACTCACTgACTCCCTTgCC-3'      |
| Rapgef4-R | 5' -gCTCgTgCACACAgTTgAAg-3'      |
| Prkaca-F  | 5' -gAgAAAaggTggAAgCTCCCTT-3'    |
| Prkaca-R  | 5' -ggCACAAGCACACCCTAAA-3'       |
